# Supplementary material for: Efficacy and safety of golimumab as add-on therapy to disease-modifying antirheumatic drugs: results of the GO-MORE study
Source: HighWire-hosted journal article supplement (doi:10.1136/annrheumdis-2013-203229), 2013-06-06
Supplement: annrheumdis-2013-203229supp_figures.pdf [file annrheumdis-2013-203229supp_figures.pdf]

**Supplemental Figure 1. Percentage of patients in Part 1 with good or moderate EULAR DAS28-ESR response by concomitant DMARD background (A) and concomitant corticosteroid use (B).**

**A**

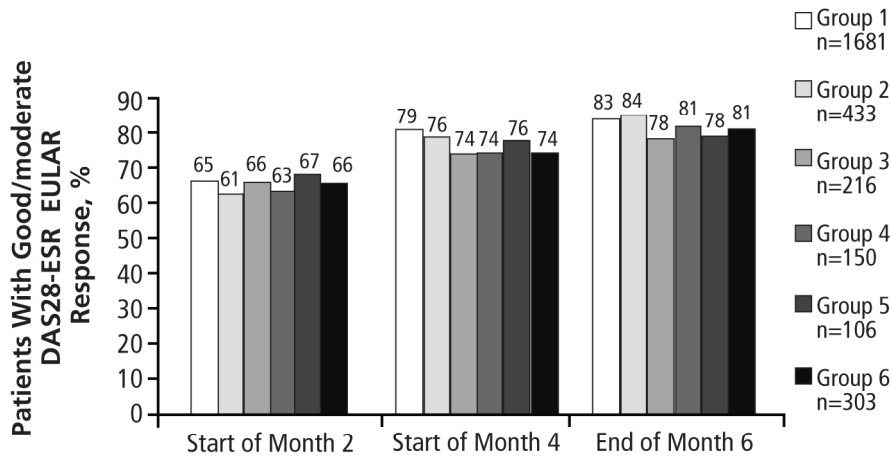

**B**

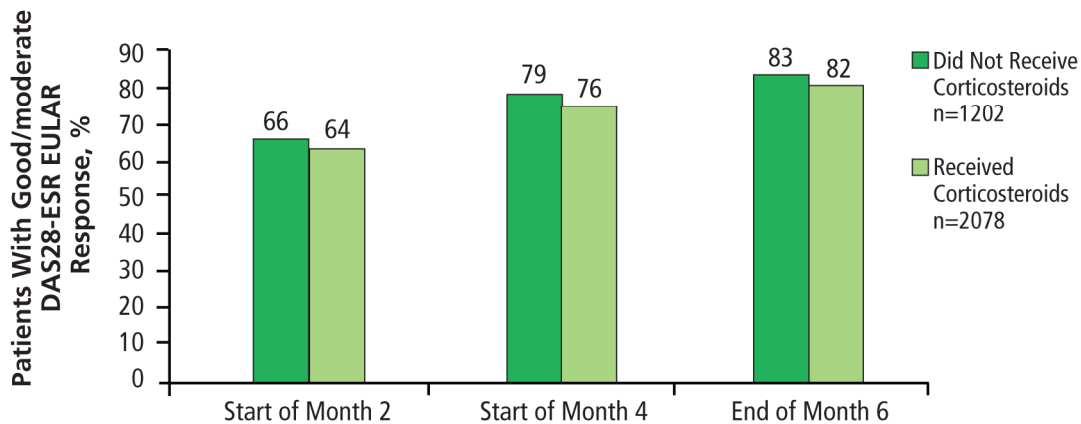

**A:** Group 1: MTX only; Group 2: MTX + hydroxychloroquine, chloroquine, chloroquine phosphate; Group 3: MTX + leflunomide; Group 4: MTX + sulfasalazine; Group 5: MTX + hydroxychloroquine, chloroquine, chloroquine phosphate + sulfasalazine; Group 6: leflunomide only. Patients taking other DMARD combinations were not included in this analysis.

**B:** DAS28 = 28-joint disease activity score; DMARD = disease-modifying antirheumatic drug; ESR = erythrocyte sedimentation rate; EULAR = European League Against Rheumatism; MTX = methotrexate.

Supplemental Figure 2. Percentage of patients with high or moderate disease activity at baseline who attained DAS28-ESR remission (A), DAS28-CRP remission (B), and SDAI remission (C) at months 2, 4, and 6.<sup>a</sup>

**A**

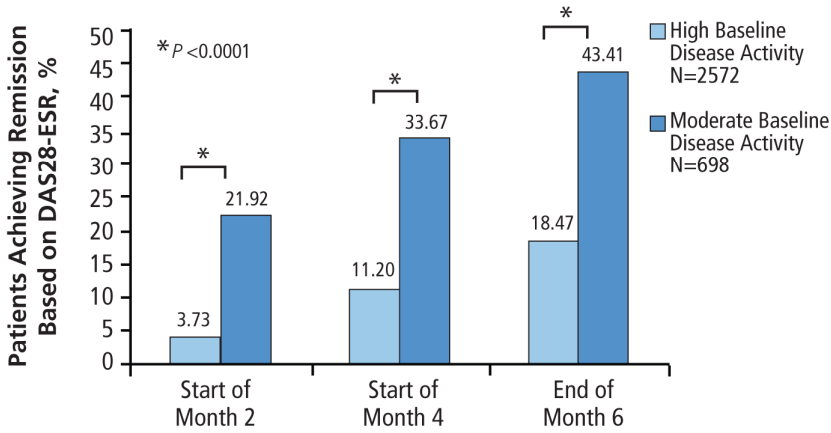

**B**

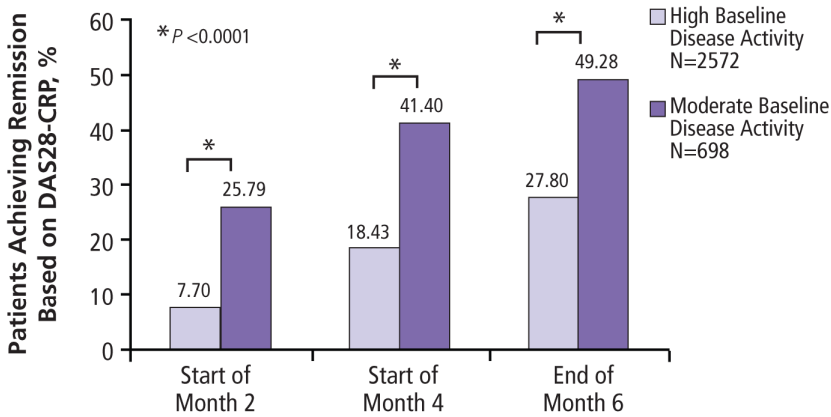

**C**

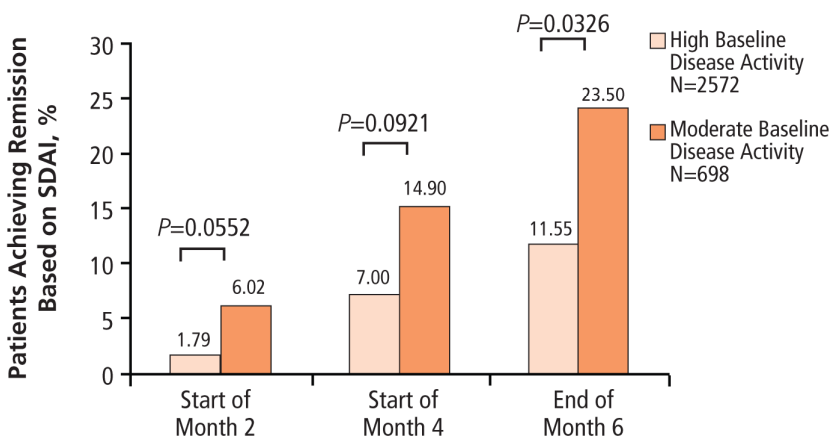

<sup>a</sup>High baseline disease activity defined as DAS28-ESR >5.1; moderate baseline disease activity defined as DAS28-ESR  $\geq$ 3.2 and  $\leq$ 5.1. DAS28-ESR remission was defined as DAS28-ESR <2.6. DAS28-CRP remission was defined as DAS28-CRP <2.6. SDAI remission was defined as SDAI  $\leq$ 3.3.

CRP = C-reactive protein; DAS28 = 28-joint disease activity score; ESR = erythrocyte sedimentation rate; SDAI = Simplified Disease Activity Index.

**Supplemental Figure 3: Concomitant MTX and concomitant leflunomide-only patient subgroups:<sup>a</sup> percentage of patients who achieved good or moderate EULAR response (A) and remission in Part 1 (B).<sup>b</sup>**

**A**

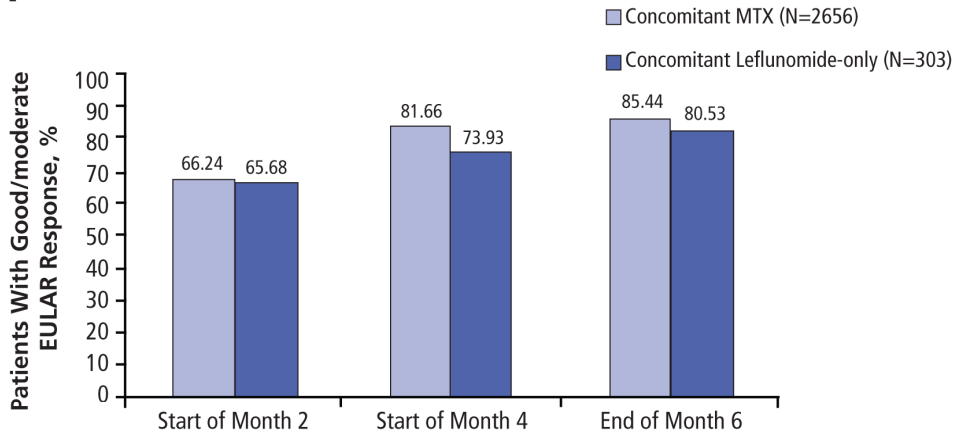

**B**

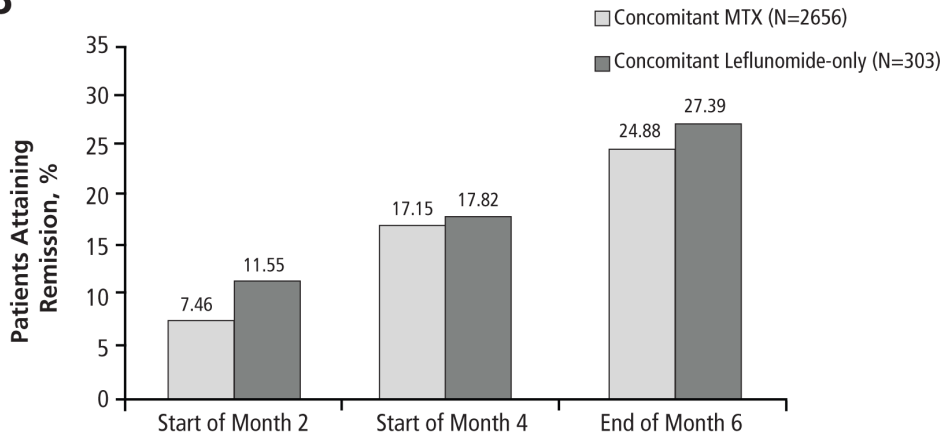

<sup>a</sup>The concomitant MTX subgroup includes any patients in the efficacy-evaluable population who received concomitant MTX, including those receiving concomitant MTX+leflunomide

(n=282), in Part 1. The concomitant leflunomide-only subgroup includes any patients in the safety population who received only concomitant leflunomide during Part 1.

<sup>b</sup>Good/moderate EULAR response defined as DAS28-ESR improvement of >1.2 from any baseline score or an improvement of 0.6-1.2 from a baseline score of ≤5.1. Remission defined as DAS28-ESR <2.6.

DAS28 = 28-joint disease activity score; ESR = erythrocyte sedimentation rate; EULAR = European League Against Rheumatism; MTX = methotrexate.

**Supplemental Figure 4: Concomitant MTX subgroup:<sup>a</sup> percentage of patients in Part 2 who achieved good or moderate EULAR DAS28-ESR response (A) and DAS28-ESR remission (B).**

**A**

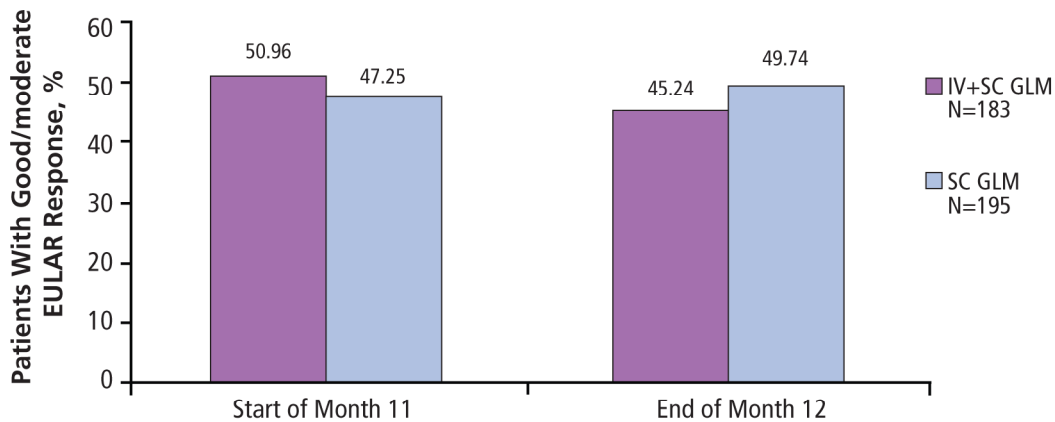

**B**

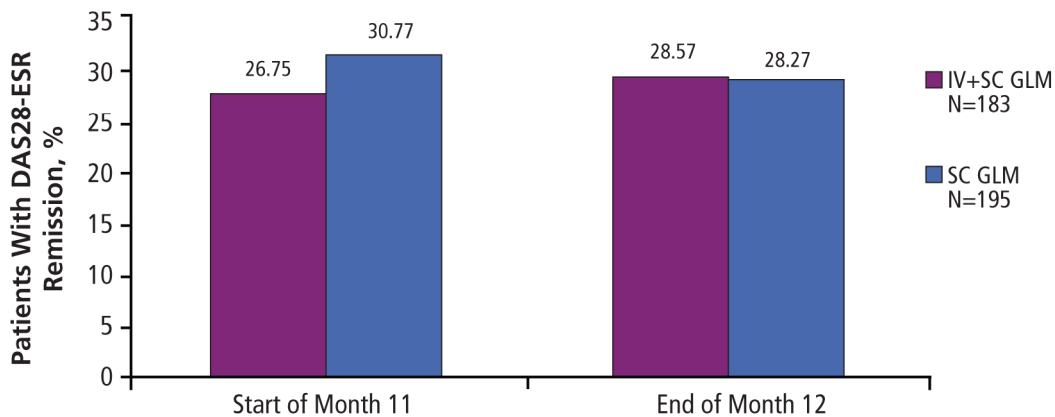

DAS28 = 28-joint disease activity score; ESR = erythrocyte sedimentation rate; EULAR = European League Against Rheumatism; GLM = golimumab; IV = intravenous; MTX = methotrexate; SC = subcutaneous.

<sup>a</sup>The concomitant MTX subgroup includes all patients who received concomitant MTX in Part 2.
